# Supplementary material for: Collagen-producing lung cell atlas identifies multiple subsets with distinct localization and relevance to fibrosis
Source: PubMed Central journal article supplement (PMC7174390; doi:10.1038/s41467-020-15647-5), 2020-04-21
Supplement: 41467_2020_15647_MOESM1_ESM.pdf [file 41467_2020_15647_MOESM1_ESM.pdf]

# **Collagen-producing lung cell atlas identifies multiple subsets with distinct localization and relevance to fibrosis**

Tsukui et al.

## Supplementary information

Supplementary Figure 1 – 8

Supplementary Table 1, 2

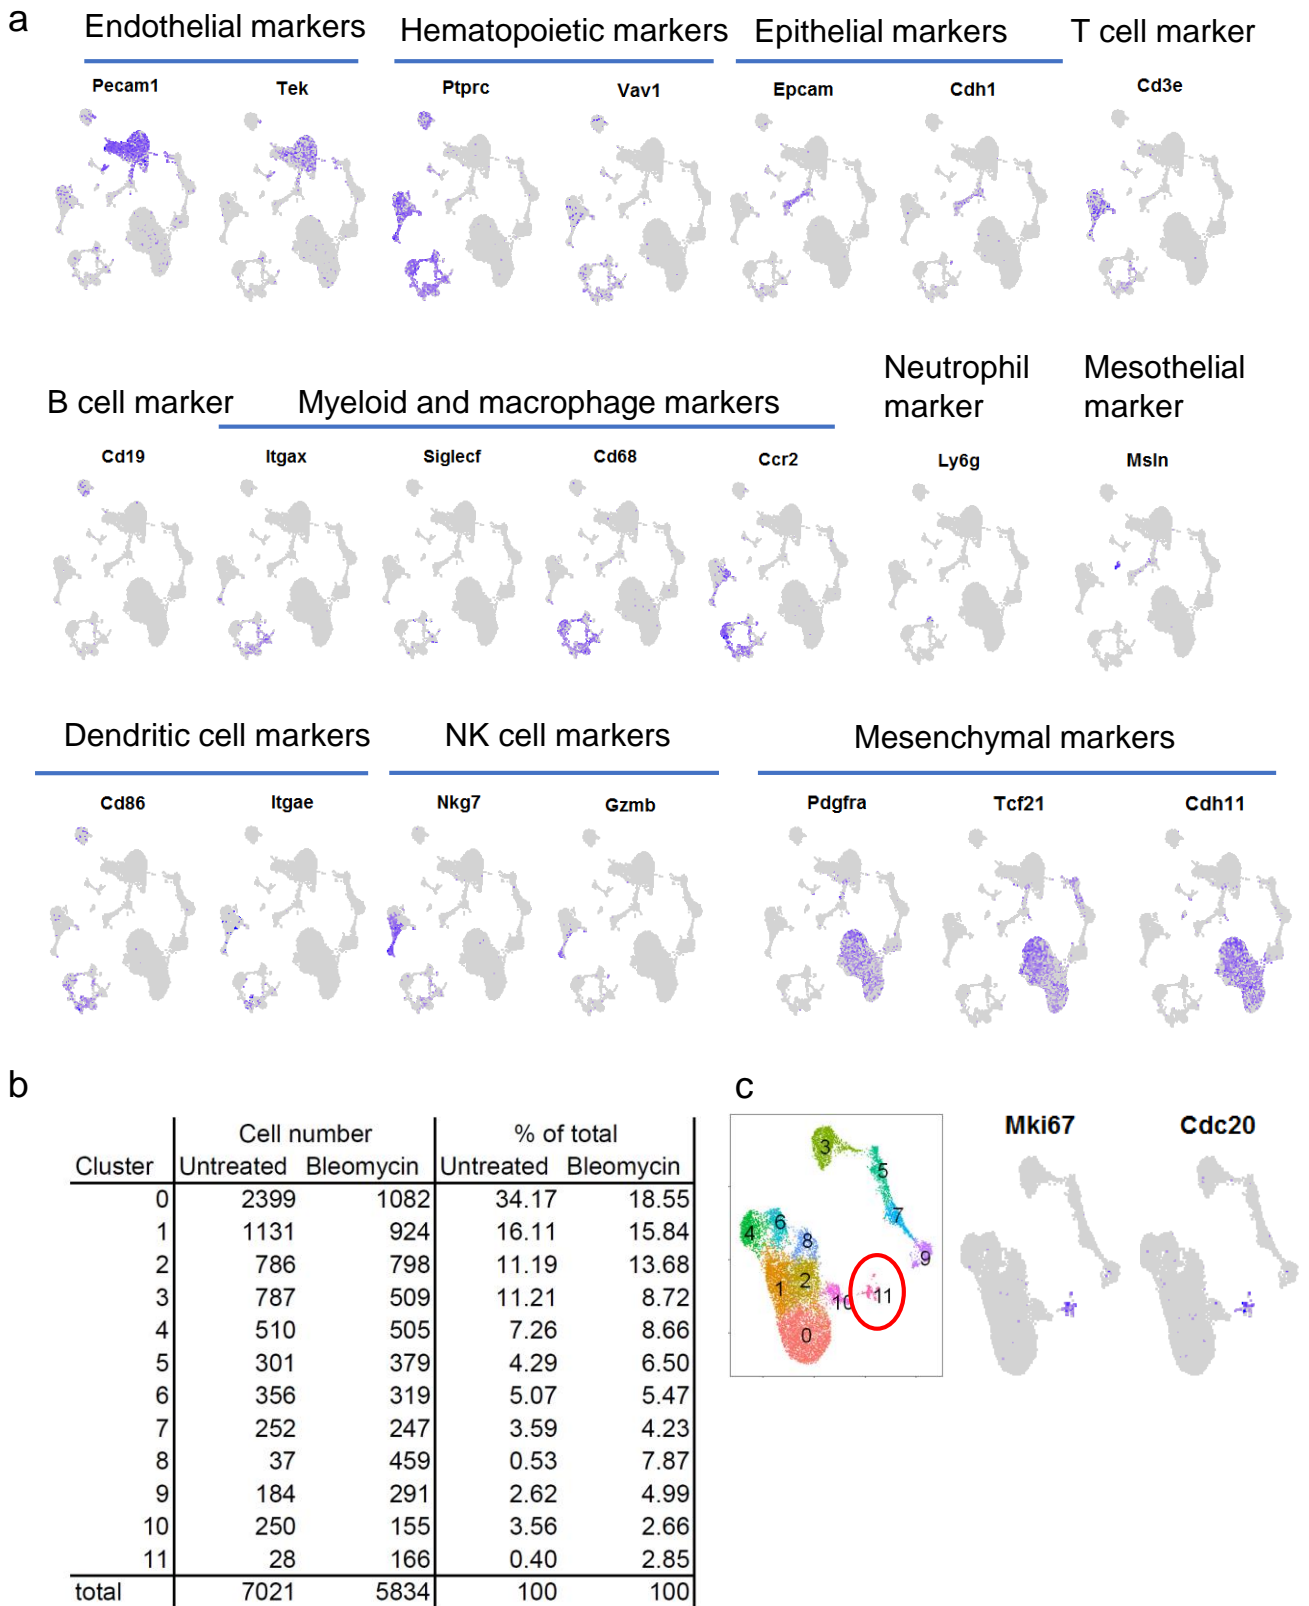

**Supplementary Fig. 1. scRNA-seq of murine lung cells in normal and fibrotic lungs**

(a) Expression levels of lineage marker genes on UMAP plots of all cells. (b) Table showing cell numbers and percentages of total cells for each cluster. (c) Expression levels of proliferation marker genes on UMAP plots of Col1a1+ cells

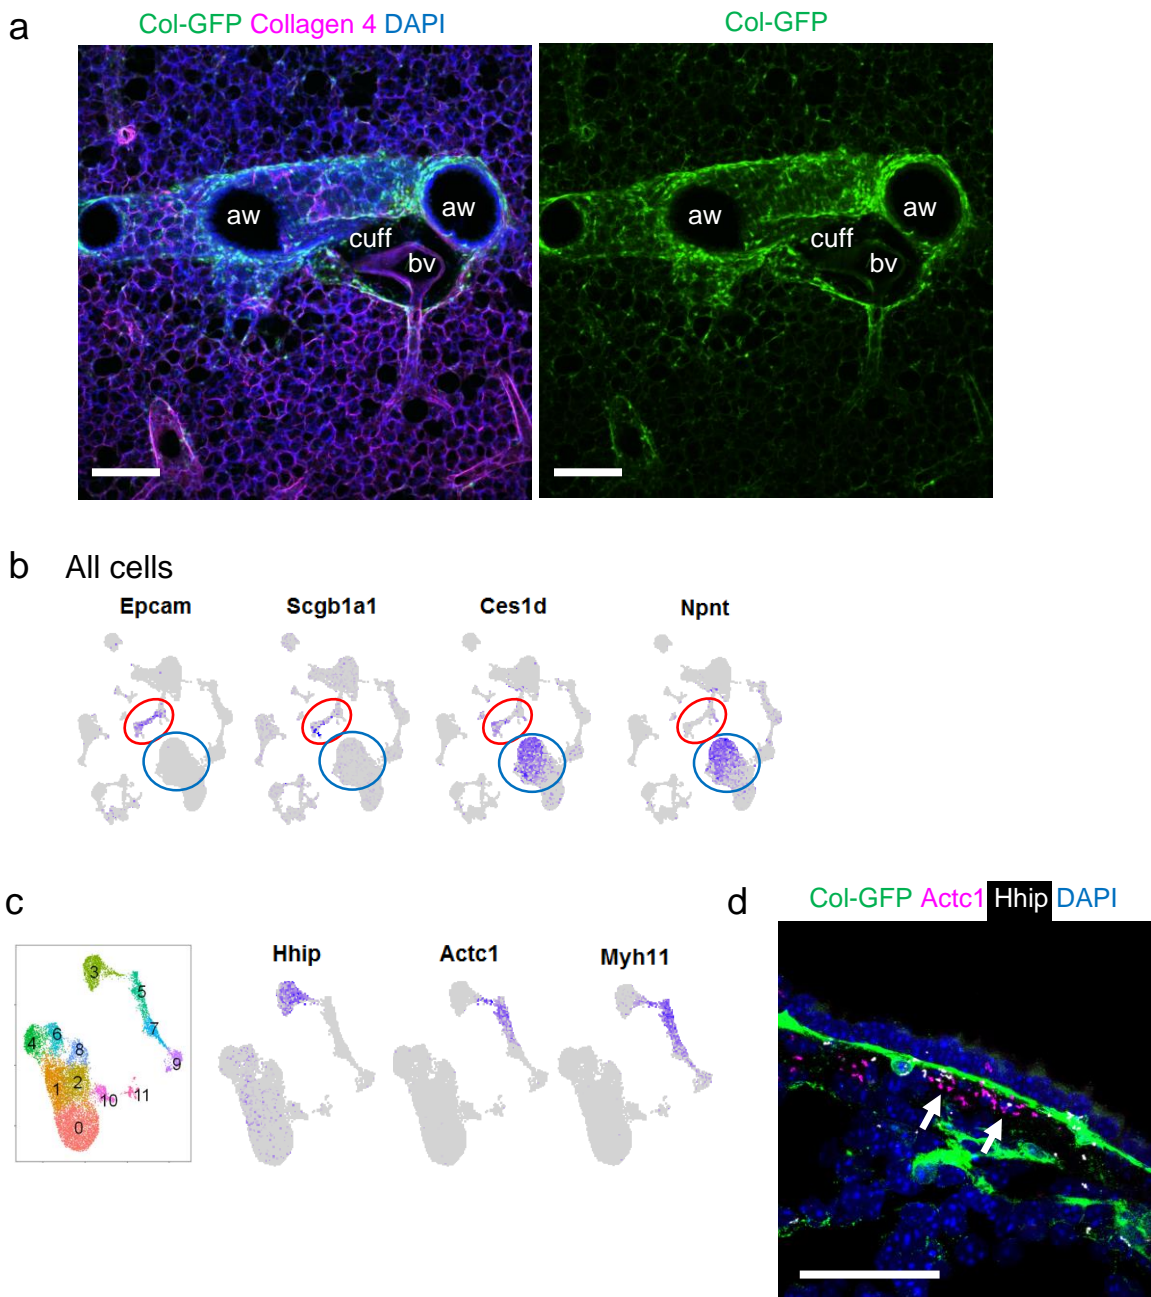

**Supplementary Fig. 2. Identification of alveolar, adventitial, and peribronchial fibroblasts**  
 (a) Images of Collagen 4 staining (magenta) in untreated Col-GFP (green) mouse lungs. DAPI signal is shown in blue. Scale bars, 200  $\mu\text{m}$ . aw, airway. bv, blood vessel. cuff, cuff space. Images are representative from two experiments ( $n \geq 2$ ). (b) Expression levels of epithelial markers and clusters 0, 1, 2, 10 markers on UMAP plots. Red and blue circles indicate epithelial clusters and clusters 0, 1, 2, 10, respectively. (c) Expression levels of Hhip, Actc1 and Myh11 on UMAP plots. (d) Representative PLISH image for Actc1 (magenta) and Hhip (white). Arrows indicate Actc1+ smooth muscle cells, which is distinctive from peribronchial fibroblasts. Col-GFP is shown in green. DAPI signal is shown in blue. Images are representative from two experiments ( $n \geq 2$ ). Scale bar, 50  $\mu\text{m}$ .

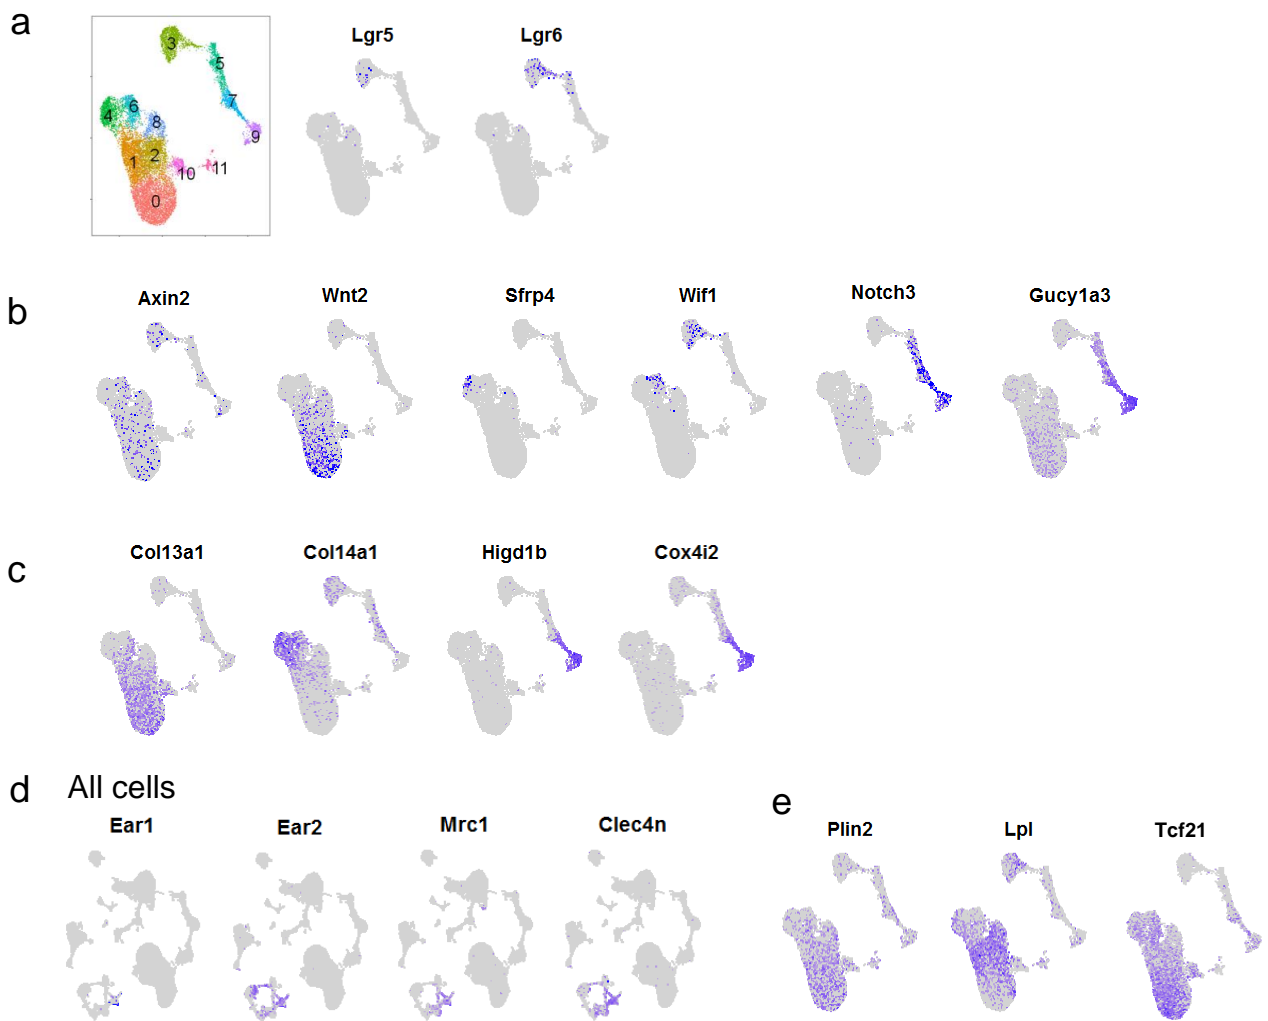

**Supplementary Fig. 3. Population comparison to previous studies**

(a-c, e) Expression levels of genes related to previously described clusters on UMAP plots of Col1a1+ cells. (d) Expression levels of genes described as lipofibroblast makers in Xie et al. on UMAP plots of all cells.

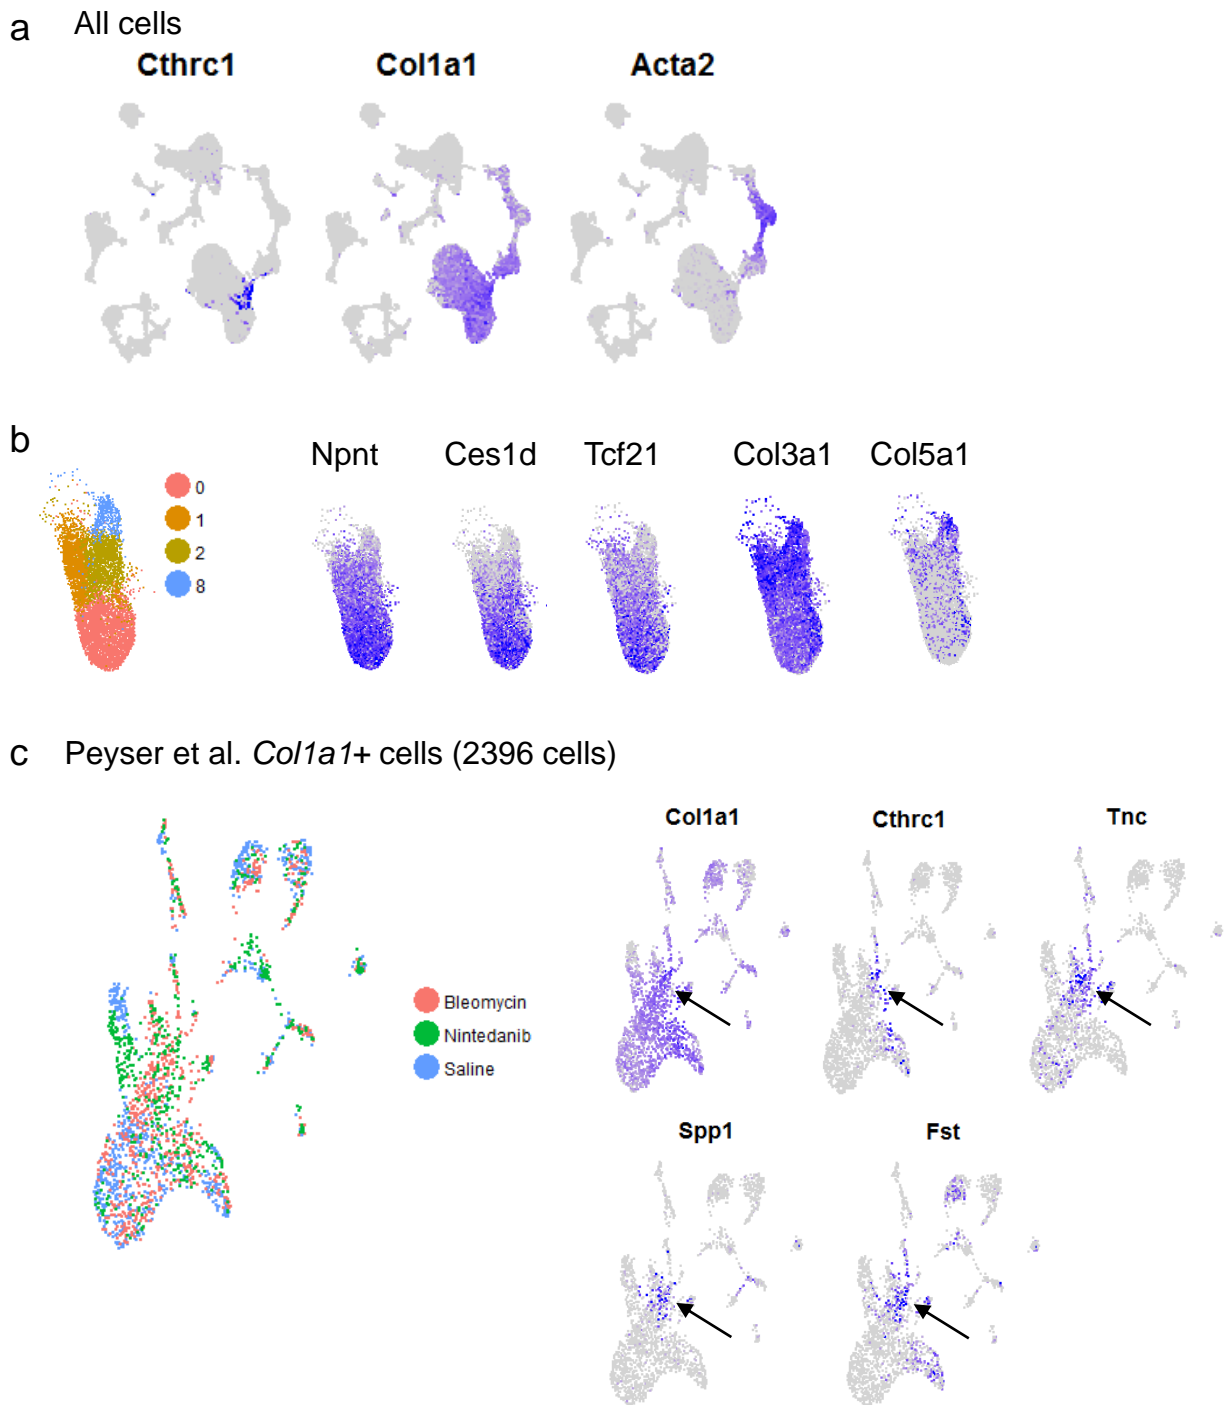

**Supplementary Fig. 4. Cthrc1+ cells express pathologic ECM genes in fibrotic lungs**

(a) Expression levels of Cthrc1, Col1a1, and Acta2 on UMAP plots of all cells. (b) Expression levels of alveolar fibroblast markers on UMAP plots of clusters 0, 1, 2, 8. (c) UMAP plots of Col1a1+ cells from Peyser et al. Cells were color-coded for bleomycin, nintedanib, and saline samples (left) or gene expression was overlaid (right). Arrows indicate cells which highly expressed cluster 8 markers.

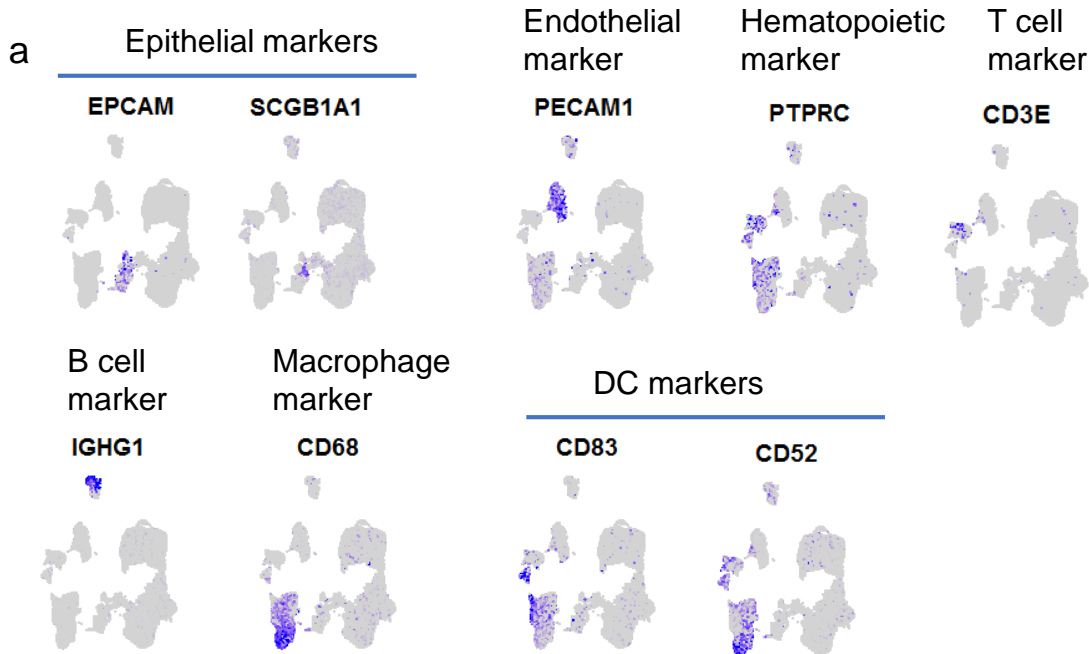

**b**

| Cluster | Cel number |       |             | % of total |       |             |
|---------|------------|-------|-------------|------------|-------|-------------|
|         | Normal     | IPF   | Scleroderma | Normal     | IPF   | Scleroderma |
| 0       | 1141       | 6983  | 3594        | 7.48       | 30.78 | 33.74       |
| 1       | 8814       | 2483  | 278         | 57.80      | 10.95 | 2.61        |
| 2       | 1755       | 5414  | 1993        | 11.51      | 23.87 | 18.71       |
| 3       | 463        | 4567  | 3895        | 3.04       | 20.13 | 36.56       |
| 4       | 1796       | 1456  | 366         | 11.78      | 6.42  | 3.44        |
| 5       | 697        | 1251  | 445         | 4.57       | 5.51  | 4.18        |
| 6       | 584        | 530   | 82          | 3.83       | 2.34  | 0.77        |
| total   | 15250      | 22684 | 10653       | 100        | 100   | 100         |

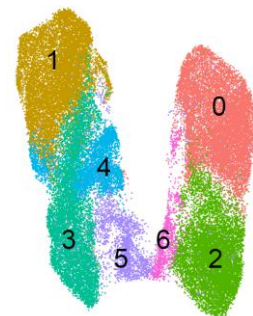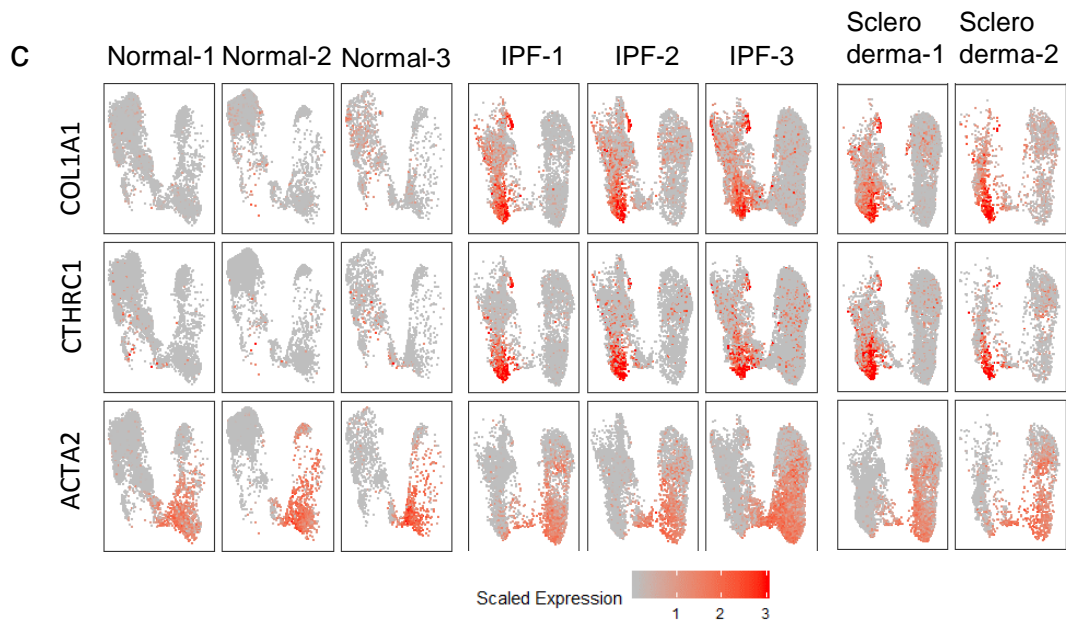

**Supplementary Fig. 5. scRNA-seq identifies CTHRC1+ pathologic fibroblasts in human fibrotic lungs**  
 (a) Expression levels of lineage markers on UMAP plots of all cells from human samples. (b) Table showing cell numbers and percentages of total cells for each cluster of COL1A1+ cells. UMAP plot of COL1A1+ cells colored by each cluster is shown at the right. (c) Expression levels of COL1A1, CTHRC1, and ACTA2 on UMAP plots of COL1A1+ cells from our data set. Cells from each sample are shown in each column.

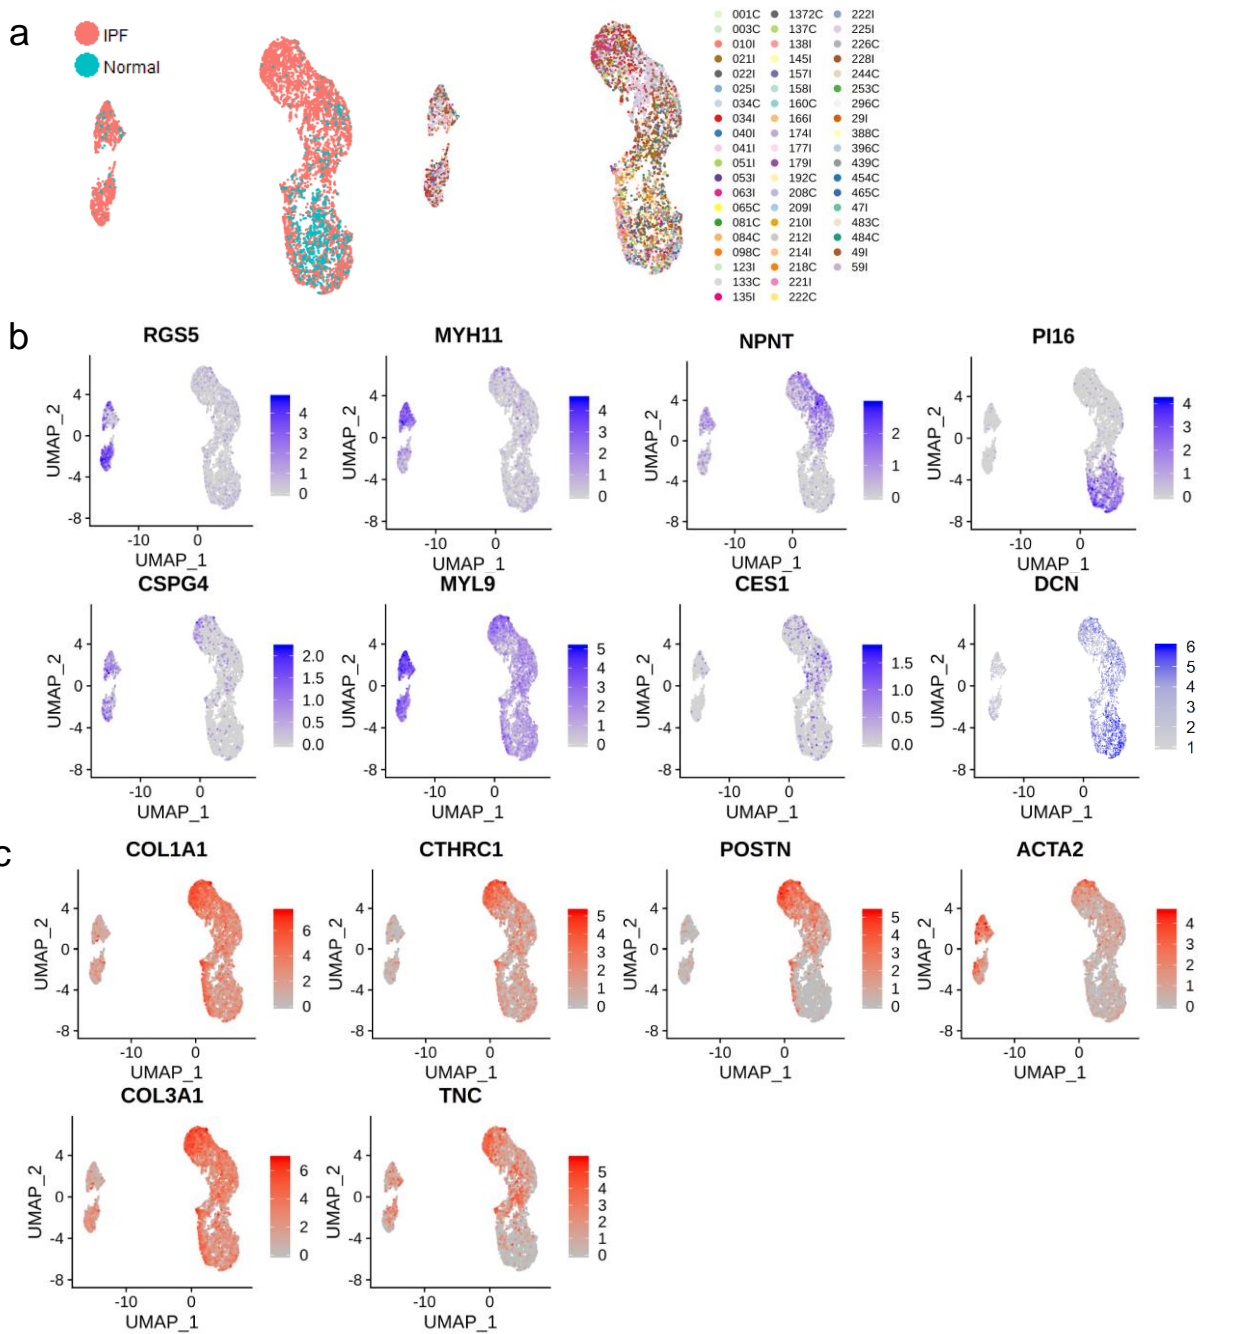

**d** Morse et al. *COL1A1*<sup>+</sup> cells (3768 cells)

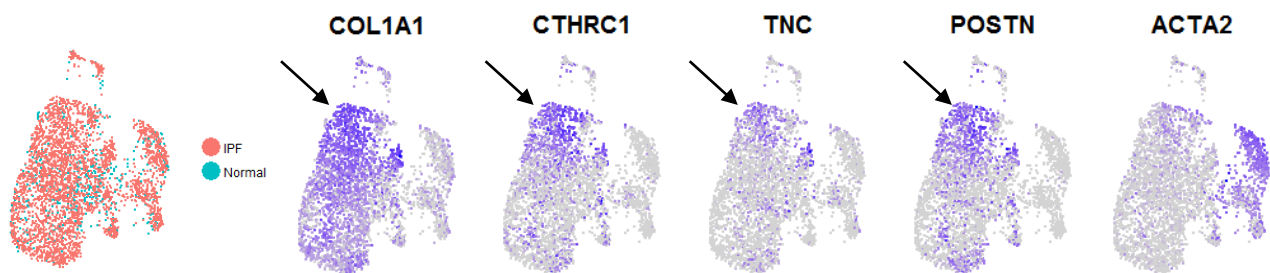

**Supplementary Fig. 6. Emergence of CTHRC1+ pathologic fibroblasts in human fibrotic lungs is consistent in larger and public data sets**

(a) UMAP plots of COL1A1+ cells from the large data set of 29 normal and 32 IPF lungs. The left panel is colored by normal and IPF samples. The right panel is colored by each sample. (b, c) Gene expression levels on UMAP plots of COL1A1+ cells from the large data sets. (d) UMAP plots of COL1A1+ cells from the data set of Morse et al. Arrows indicate COL1A1high cells which also expressed CTHRC1, TNC, and POSTN.



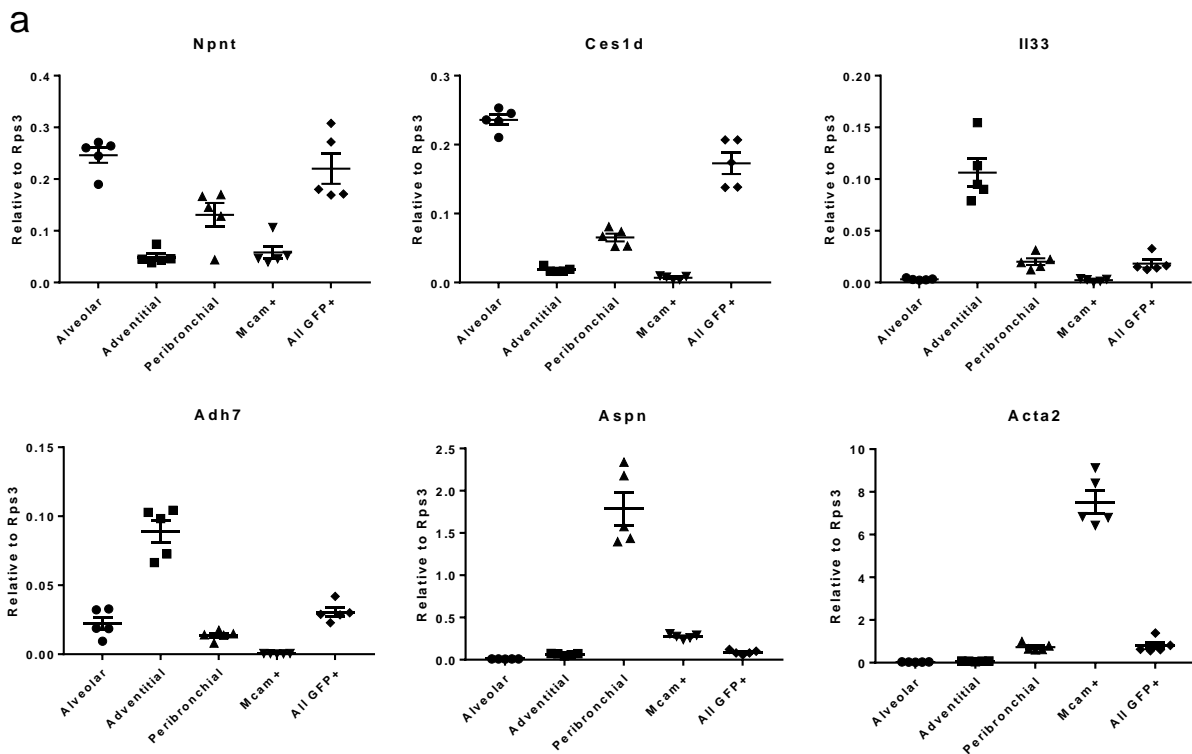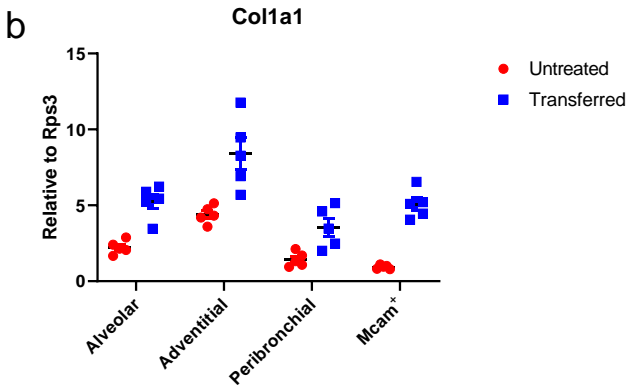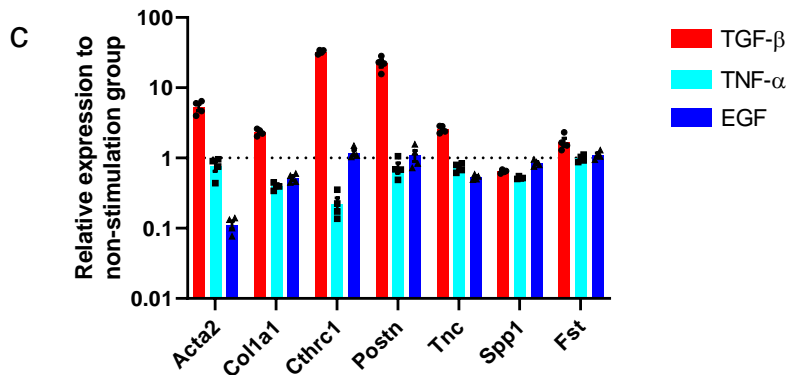

**Supplementary Fig. 7. FACS purification of fibroblast subpopulations and their ability to colonize fibrosing lungs in adoptive transfer**

(a) qPCR analysis of purified cells from untreated lungs. n = 5 mice. (b) qPCR analysis of purified GFP+ cells from the host lungs. Cells purified from untreated Col-GFP mice were shown as control. n = 5 mice. (c) qPCR analysis of primary alveolar fibroblasts after 24 hr-stimulation of TGF- $\beta$ , TNF- $\alpha$ , or EGF in vitro. Data were normalized to non-stimulation group. n = 4 mice. Data are means  $\pm$  SEM. Source data are provided as a Source Data file.

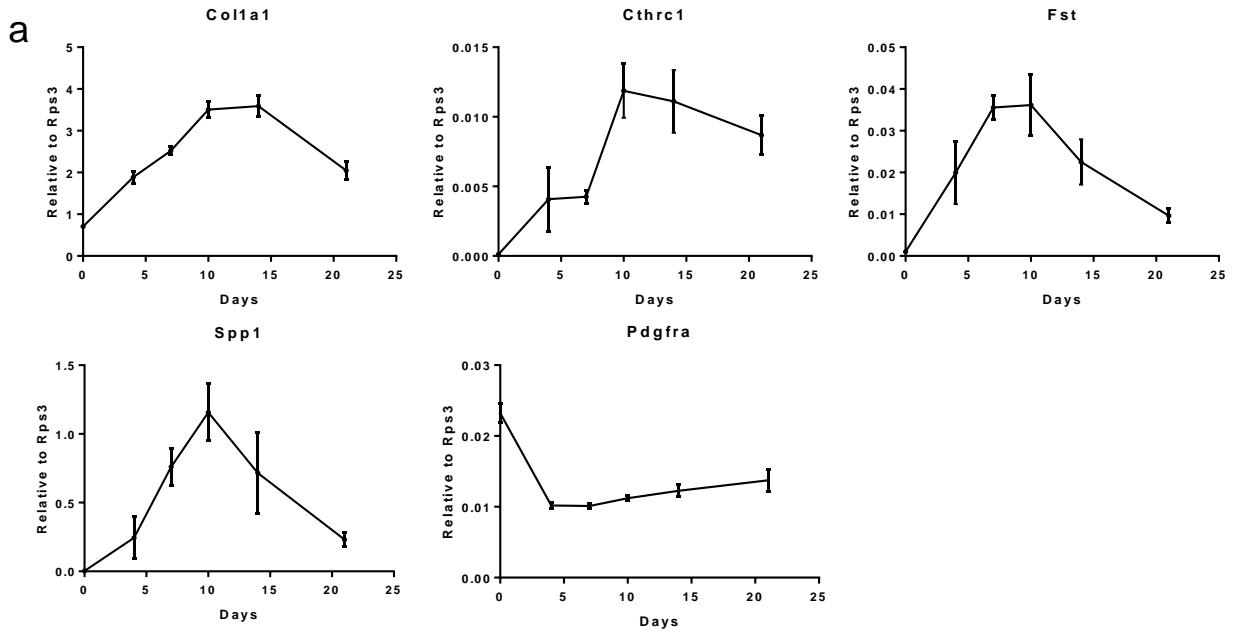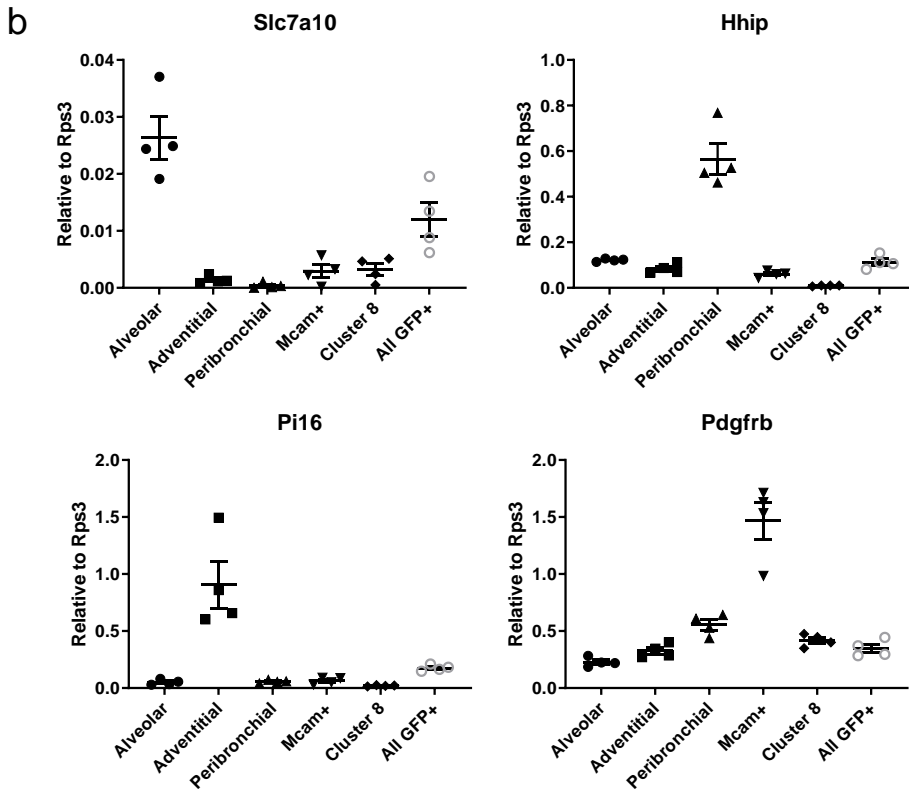

**Supplementary Fig. 8. Purified Cthrc1+ pathologic fibroblasts showed high migration and invasion capacity**

(a) Time course analysis of Col-GFP+ cells in bleomycin-induced fibrosis. Col-GFP+ cells were purified on each time point and qPCR analysis of purified cells was performed.  $n = 4$  (day 0, 4) or 5 (day 7, 10, 14, 21) mice. (b) qPCR analysis of purified cells from bleomycin-treated lungs.  $n = 4$  mice. Data are means  $\pm$  SEM. Source data are provided as a Source Data file.

## Supplementary Table 1. Oligos for PLISH

|                    |                                                 |                                                           |
|--------------------|-------------------------------------------------|-----------------------------------------------------------|
| Common oligos      | LP1m                                            | /5Cy5/ CTATACTACTCGACCTATA                                |
|                    | LP2m                                            | /5Cy3/ CAGAACCATCAATAGCTAAGT                              |
|                    | CCC2.1                                          | ATTCTGACCTAAACAAACATGCGTCTATAGTGGAGCCACATAAATTAACCTGGCTAT |
|                    | VB01-P1                                         | ACTACTCGACCTATAACCATAACGACGTAAGT                          |
|                    | VB02-P2                                         | AGTCGTCTACACAGAACCATCAATAGCTAAGT                          |
| Probes             | HLC2-VB1-Hhip 310                               | AGGTCAGGAATACTTACGTCGTTATGGAGGAGCAGCAAGATAAAGTG           |
|                    | HRC2-VB1-Hhip 310                               | CAACTTTGCCTTAGGGCAGTTTATAGGTCGAGTAGTATAGCCAGGTT           |
|                    | HLC2-VB1-Hhip 720                               | AGGTCAGGAATACTTACGTCGTTATGGACTCGTGGGTAGAAGCCACC           |
|                    | HRC2-VB1-Hhip 720                               | CACTCTGCAGGCAGCAAGATTTATAGGTCGAGTAGTATAGCCAGGTT           |
|                    | HLC2-VB1-Hhip 1072                              | AGGTCAGGAATACTTACGTCGTTATGGAGATGCTGGTCCTCTGACTT           |
|                    | HRC2-VB1-Hhip 1072                              | TCCATCTGGCCCAAGTAGTTTTATAGGTCGAGTAGTATAGCCAGGTT           |
|                    | HLC2-VB1-Hhip 1426                              | AGGTCAGGAATACTTACGTCGTTATGGAGCCACCCTTCTGGTTGG             |
|                    | HRC2-VB1-Hhip 1426                              | ATGTGGTCGTGAGGCCAATTTATAGGTCGAGTAGTATAGCCAGGTT            |
|                    | HLC2-VB1-Hhip 1709                              | AGGTCAGGAATACTTACGTCGTTATGGAAGGCACATTGCACATGTCG           |
|                    | HRC2-VB1-Hhip 1709                              | GTTACTCCGAGGTATGGAATTTATAGGTCGAGTAGTATAGCCAGGTT           |
|                    | HLC2-VB1-Hhip 1816                              | AGGTCAGGAATACTTACGTCGTTATGGAGGATGTCGATCCACGGCAC           |
|                    | HRC2-VB1-Hhip 1816                              | AAATTGATGTTTATATCAGTTTATAGGTCGAGTAGTATAGCCAGGTT           |
|                    | HLC2-VB1-Hhip 2129                              | AGGTCAGGAATACTTACGTCGTTATGGAGCCTCGACAGGAGCTGCTG           |
|                    | HRC2-VB1-Hhip 2129                              | CAAGATGTGACCCGAAAAGTTTATAGGTCGAGTAGTATAGCCAGGTT           |
|                    | HLC2-VB1-Hhip 2169                              | AGGTCAGGAATACTTACGTCGTTATGGAATTCATCTTCTCAAATCC            |
|                    | HRC2-VB1-Hhip 2169                              | ATAGAATGTAACCTCTCCTTTATAGGTCGAGTAGTATAGCCAGGTT            |
|                    | HLC2-VB1-Ccl11 60                               | AGGTCAGGAATACTTACGTCGTTATGGAGGGAGCAGAGTGGGTGGAA           |
|                    | HRC2-VB1-Ccl11 60                               | GCTCTCCCGACTAGCTTTATTTATAGGTCGAGTAGTATAGCCAGGTT           |
|                    | HLC2-VB1-Ccl11 249                              | AGGTCAGGAATACTTACGTCGTTATGGACTGGTCATGATAAAGCAGC           |
|                    | HRC2-VB1-Ccl11 249                              | AGTGTGTTGGGGATCTTCTTTATAGGTCGAGTAGTATAGCCAGGTT            |
|                    | HLC2-VB1-Ccl11 450                              | AGGTCAGGAATACTTACGTCGTTATGGAGTGTCAAGAGAGGAGGTTG           |
|                    | HRC2-VB1-Ccl11 450                              | CAGTTCTTAGGCTCTGGGTTTTATAGGTCGAGTAGTATAGCCAGGTT           |
|                    | HLC2-VB1-Ccl11 510                              | AGGTCAGGAATACTTACGTCGTTATGGATTCCCTCAGAGCAGCTCTT           |
|                    | HRC2-VB1-Ccl11 510                              | CTTGGGCGACTGGTGCTGATTTATAGGTCGAGTAGTATAGCCAGGTT           |
|                    | HLC2-VB1-Ccl11 571                              | AGGTCAGGAATACTTACGTCGTTATGGAATGACTTCCAGTCCCATCT           |
|                    | HRC2-VB1-Ccl11 571                              | TGACTTATTTAGCAAAACATTTATAGGTCGAGTAGTATAGCCAGGTT           |
|                    | HLC2-VB1-Ccl11 935                              | AGGTCAGGAATACTTACGTCGTTATGGACAGGTCAGTCAGGGTGATA           |
|                    | HRC2-VB1-Ccl11 935                              | CCTGGTCTACACAGTGAGTTTTATAGGTCGAGTAGTATAGCCAGGTT           |
|                    | HLC2-VB2-Adh7 274                               | AGGTCAGGAATACTTAGCTATTGATGGATGGTCATCTGTGCGACAGA           |
|                    | HRC2-VB2-Adh7 274                               | ACCATCGATCCTTTTATTATTCTGTGTAGACGACTATAGCCAGGTT            |
|                    | HLC2-VB2-Adh7 879                               | AGGTCAGGAATACTTAGCTATTGATGGAGCACCTCACTGATGGGCTT           |
|                    | HRC2-VB2-Adh7 879                               | TGTTGCCTGTCATGTCGGATTTCTGTGTAGACGACTATAGCCAGGTT           |
| HLC2-VB2-Adh7 983  | AGGTCAGGAATACTTAGCTATTGATGGTGGTCCCATAGTTCATATGG |                                                           |
| HRC2-VB2-Adh7 983  | AGGAGCACCAACCACCACTTCTGTGTAGACGACTATAGCCAGGTT   |                                                           |
| HLC2-VB2-Adh7 1062 | AGGTCAGGAATACTTAGCTATTGATGGTCCACGTACGCCAGTGAA   |                                                           |
| HRC2-VB2-Adh7 1062 | ACCCTCAAAGACGCAGCCCTTCTGTGTAGACGACTATAGCCAGGTT  |                                                           |
| HLC2-VB2-Adh7 1149 | AGGTCAGGAATACTTAGCTATTGATGGTGGTCCAGGTCAAATCTCTT |                                                           |
| HRC2-VB2-Adh7 1149 | GCAAGGTGTGGGTTTCAACTTCTGTGTAGACGACTATAGCCAGGTT  |                                                           |
| HLC2-VB2-Aspn 586  | AGGTCAGGAATACTTAGCTATTGATGGATCAAATGGAATGTTGTTTG |                                                           |
| HRC2-VB2-Aspn 586  | TGAAGGTCAACCATTCGAGTTTCTGTGTAGACGACTATAGCCAGGTT |                                                           |
| HLC2-VB2-Aspn 942  | AGGTCAGGAATACTTAGCTATTGATGGACTGTCACCCCTCAAATGC  |                                                           |
| HRC2-VB2-Aspn 942  | CAGCGATCCTGATATGGAATTTCTGTGTAGACGACTATAGCCAGGTT |                                                           |

HLC2-VB2-Aspn 2084 AGGTCAGGAATACTTAGCTATTGATGGACTGTGTTCTTCAAAGCTTA  
HRC2-VB2-Aspn 2084 CACTATGTAACCTAACAGTTTTCTGTGTAGACGACTATAGCCAGGTT  
HLC2-VB2-Aspn 1082 AGGTCAGGAATACTTAGCTATTGATGGTTTGCAGTTCCTGTACCGT  
HRC2-VB2-Aspn 1082 GTTGTTTCCAAGACCCAGCCTTCTGTGTAGACGACTATAGCCAGGTT  
HLC2-VB2-Aspn 1151 AGGTCAGGAATACTTAGCTATTGATGGTCACACGTGGTATATTAGCA  
HRC2-VB2-Aspn 1151 GTGTTCCAAGTGTATCTCTTCTGTGTAGACGACTATAGCCAGGTT  
HLC2-VB2-Aspn 2100 AGGTCAGGAATACTTAGCTATTGATGGTATGTAACCTAACAGTTACT  
HRC2-VB2-Aspn 2100 CCTAGTTGAAGTAATAACACTTCTGTGTAGACGACTATAGCCAGGTT  
HLC2-VB1-Npnt 262 AGGTCAGGAATACTTACGTCGTTATGGAGGAGCACAGCCATGCCGGA  
HRC2-VB1-Npnt 262 AGGACGCGAGCACCCGCGCTTTATAGGTCGAGTAGTATAGCCAGGTT  
HLC2-VB1-Npnt 334 AGGTCAGGAATACTTACGTCGTTATGGATTTGCCCTGGGCCACCTCCC  
HRC2-VB1-Npnt 334 ATAGGCCGATTGAAGAACTTTATAGGTCGAGTAGTATAGCCAGGTT  
HLC2-VB1-Npnt 603 AGGTCAGGAATACTTACGTCGTTATGGATCCGTTGAGACAGTAGCAC  
HRC2-VB1-Npnt 603 CCCGCTGGCAGCAGCATGTTTATAGGTCGAGTAGTATAGCCAGGTT  
HLC2-VB1-Npnt 861 AGGTCAGGAATACTTACGTCGTTATGGACATGAGGTCGAAACCAGTG  
HRC2-VB1-Npnt 861 CTGATATTTGCCCTCCAATGTTTATAGGTCGAGTAGTATAGCCAGGTT  
HLC2-VB1-Npnt 2622 AGGTCAGGAATACTTACGTCGTTATGGAAGCTGCCTTGACCTTGCA  
HRC2-VB1-Npnt 2622 TTTTAACTCAGGGGATCATTATAGGTCGAGTAGTATAGCCAGGTT  
HLC2-VB2-Ces1d 95 AGGTCAGGAATACTTAGCTATTGATGGAGAGGCCATTGTGGAAGGA  
HRC2-VB2-Ces1d 95 AGAAAGCCATATCAGAGGGTTTCTGTGTAGACGACTATAGCCAGGTT  
HLC2-VB2-Ces1d 1804 AGGTCAGGAATACTTAGCTATTGATGGAAGCACAGCTGACCTCCTG  
HRC2-VB2-Ces1d 1804 TCCTTGACTCCAGGTTCTTTCTGTGTAGACGACTATAGCCAGGTT  
HLC2-VB1-Pi16 547 AGGTCAGGAATACTTACGTCGTTATGGAGCCTTGCGGAAGGCGGCC  
HRC2-VB1-Pi16 547 CCACACGCACCTTCTGAGCGTTTATAGGTCGAGTAGTATAGCCAGGTT  
HLC2-VB1-Pi16 1671 AGGTCAGGAATACTTACGTCGTTATGGACCCGAAGCACTAGGGAAGG  
HRC2-VB1-Pi16 1671 GTGCGCCACCTGTGGCATTATAGGTCGAGTAGTATAGCCAGGTT  
HLC2-VB1-Pi16 973 AGGTCAGGAATACTTACGTCGTTATGGTTGGAGGCGAATCCTGCGCC  
HRC2-VB1-Pi16 973 GGAAGGGACCTCGGTCACCCCTTATAGGTCGAGTAGTATAGCCAGGTT  
HLC2-VB1-Pi16 1902 AGGTCAGGAATACTTACGTCGTTATGGTTGTTTGAGCGATAGGATAG  
HRC2-VB1-Pi16 1902 TTTGGCCAGGCGTGGTATCTTATAGGTCGAGTAGTATAGCCAGGTT  
HLC2-VB2-Col1a1 419 AGGTCAGGAATACTTAGCTATTGATGGACATCTTCTGAGTTGGTGA  
HRC2-VB2-Col1a1 419 CCTTGGGTCCCTCGACTCCTTCTGTGTAGACGACTATAGCCAGGTT  
HLC2-VB2-Col1a1 1566 AGGTCAGGAATACTTAGCTATTGATGGACCAGGTTCCACCAGCTCGC  
HRC2-VB2-Col1a1 1566 GCACCAGGGAACCACGGCTTTCTGTGTAGACGACTATAGCCAGGTT  
HLC2-VB2-Col1a1 3679 AGGTCAGGAATACTTAGCTATTGATGGAACCGCCACTGGGAGGTCCA  
HRC2-VB2-Col1a1 3679 AGGCAGGAAGTGAAGTCATTCTGTGTAGACGACTATAGCCAGGTT  
HLC2-VB1-Cthrc1 394 AGGTCAGGAATACTTACGTCGTTATGGAGTTGGGGTCCAGGACTCC  
HRC2-VB1-Cthrc1 394 ACTCCACGAACACTGCTTATTTATAGGTCGAGTAGTATAGCCAGGTT  
HLC2-VB1-Cthrc1 456 AGGTCAGGAATACTTACGTCGTTATGGACACTCCGCAATTTCCCAA  
HRC2-VB1-Cthrc1 456 GAGCGCATCTTCTGGAATGTTTATAGGTCGAGTAGTATAGCCAGGTT  
HLC2-VB1-Cthrc1 739 AGGTCAGGAATACTTACGTCGTTATGGAATCTGAACAGGTGCCGACC  
HRC2-VB1-Cthrc1 739 AGAAGCGTCTCCTTTGGGGTTTATAGGTCGAGTAGTATAGCCAGGTT  
HLC2-VB1-Cthrc1 800 AGGTCAGGAATACTTACGTCGTTATGGAGTCTTCAATGATGATGCG  
HRC2-VB1-Cthrc1 800 GTCAGAGGCTTTATTTGCGTTTATAGGTCGAGTAGTATAGCCAGGTT  
HLC2-VB1-Cthrc1 195 AGGTCAGGAATACTTACGTCGTTATGGTTTTTGCCTCACCTTGGGGT  
HRC2-VB1-Cthrc1 195 TCCCTCTGCCGATCAGCGCTTATAGGTCGAGTAGTATAGCCAGGTT  
HLC2-VB1-Cthrc1 59 AGGTCAGGAATACTTACGTCGTTATGGTCCGAAGCAGGAGCAGGAG  
HRC2-VB1-Cthrc1 59 GGTGCATGGTGTGCGGTGGCTTATAGGTCGAGTAGTATAGCCAGGTT  
HLC2-VB1-Cthrc1 249 AGGTCAGGAATACTTACGTCGTTATGGTTTTTGCCTCACCTTGGGGT  
HRC2-VB1-Cthrc1 249 TCCCTCTGCCGATCAGCGCTTATAGGTCGAGTAGTATAGCCAGGTT

## Supplementary Table 2. Oligos for qPCR

|         |           |                          |
|---------|-----------|--------------------------|
| Primers | Rps3 F    | cggtgcagattccaagaag      |
|         | Rps3 R    | ggacttcaactccagagtagcc   |
|         | Col1a1F   | AGACATGTTTCAGCTTTGTGGAC  |
|         | Col1a1R   | GCAGCTGACTTCAGGGATG      |
|         | Acta2 F   | GTCCCAGACATCAGGGAGTAA    |
|         | Acta2 R   | TCGGATACTTCAGCGTCAGGA    |
|         | PDGFRa F  | cggagcctgagcttgag        |
|         | PDGFRa R  | gccctgtgaggagacac        |
|         | Cthrc1 F  | aagcaaaaagcctgatcc       |
|         | Cthrc1 R  | cctgctgctcttagacac       |
|         | Hhip F    | tcaaggagccttacttgaca     |
|         | Hhip R    | gcttagcaggcccttc         |
|         | Pi16 F    | gaacgtgaaggccgtaag       |
|         | Pi16 R    | ggtttctcatggctcac        |
|         | Il33 F    | ggtgaacatgagtcctca       |
|         | Il33 R    | gtcaccctttgaagctc        |
|         | Adh7 F    | ctgctgttaaaactccaagg     |
|         | Adh7 R    | tgctttacagccatgatga      |
|         | Slc7a10 F | tgctggaactcctcaact       |
|         | Slc7a10 R | gatggcacgaggtaggctt      |
|         | Npnt F    | cagtccaacctttctacgtc     |
|         | Npnt R    | tgttgcactgtggtgaca       |
|         | Ces1d F   | cctctaccgcctatgtg        |
|         | Ces1d R   | ccttctgttggtgaagagc      |
|         | Aspn F    | acagggtggataaattctacttga |
|         | Aspn R    | tccttcatgctggcctgt       |
|         | Spp1 F    | ggaggaaaccagccaagg       |
|         | Spp1 R    | tgccagaatcagtcactttcac   |
|         | Fst F     | acctgagaaaggccacctg      |
|         | Fst R     | ggatatcttcacaggacttgcct  |
|         | Postn F   | aagctgaggcaagacaag       |
|         | Postn R   | tcaaatctgcagcttcaagg     |
