# Supplementary material for: Collagen-producing lung cell atlas identifies multiple subsets with distinct localization and relevance to fibrosis
Source: PubMed Central journal article supplement (PMC7174390; doi:10.1038/s41467-020-15647-5), 2020-04-21
Supplement: 41467_2020_15647_MOESM3_ESM.pdf [file 41467_2020_15647_MOESM3_ESM.pdf]

## **Description of Additional Supplementary Files**

**File Name:** Supplementary Movie 1

**Description:** Series of z-stack images of cleared thick section of Col-GFP mice showed unique localization of peribronchial fibroblasts. 96 images were acquired with 0.3  $\mu\text{m}$  interval. Col-GFP is shown in green.  $\alpha$ -SMA staining is shown in magenta. DAPI signal is shown in blue.

**File Name:** Supplementary Movie 2

**Description:** Series of z-stack images of cleared thick section of Col-GFP mice showed anatomical characteristics of peribronchial and adventitial fibroblasts. 101 images were acquired with 0.3  $\mu\text{m}$  interval. Col-GFP is shown in green. Collagen 4 staining is shown in magenta. DAPI signal is shown in blue.

**File Name:** Supplementary Movie 3

**Description:** Series of z-stack images of cleared thick section of Col-GFP/Shh-Cre/Rosa26-lox-stop-lox-tdTomato mice showed close association of AEC2s and alveolar fibroblasts. 122 images were acquired with 0.3  $\mu\text{m}$  interval. Col-GFP is shown in green. tdTomato is shown in magenta. DAPI signal is shown in blue.
